# Supplementary material
Source: publisher figshare collection journal article supplement (https://acs.figshare.com/ndownloader/files/5767749)
Supplement: Supplementary file 1 [file 5767749]

# ja993755i.cif

data_Ms.JA993755I

_publ_title
;
 After 155 years, a chromium carboxylate with a supershort Cr--Cr bond
;
_publ_author_name
;
 F. Albert Cotton, Elizabeth A. Hillard, Carlos A. Murillo, Hong-Cai Zhou
;
_publ_author_address
;
 Department of Chemistry and Laboratory for Molecular Structure
 and Bonding, P.O.Box 30012, Texas A&M University,
 College Station, TX 77842-3012
;

#===END 

data_xl_compound_1 
 
_audit_creation_method            SHELXL 
_chemical_name_systematic 
;
 Tetrakis(2,4,6-triisopropylbenzoicactato)dichromium(II)
;
_chemical_name_common             none
_chemical_formula_moiety          'Cr2 (C16 H23 O2)4'
_chemical_formula_structural      'Cr2 (TiPBA)4'
_chemical_formula_analytical      'not measured'
_chemical_formula_sum             'C64 H92 Cr2 O8'
_chemical_formula_weight          1093.38
_chemical_melting_point           'not measured'
_chemical_compound_source         synthesized
 
loop_ 
 _atom_type_symbol 
 _atom_type_description 
 _atom_type_scat_dispersion_real 
 _atom_type_scat_dispersion_imag 
 _atom_type_scat_source 
 'C'  'C'   0.0033   0.0016 
 'International Tables Vol C Tables 4.2.6.8 and 6.1.1.4' 
 'H'  'H'   0.0000   0.0000 
 'International Tables Vol C Tables 4.2.6.8 and 6.1.1.4' 
 'O'  'O'   0.0106   0.0060 
 'International Tables Vol C Tables 4.2.6.8 and 6.1.1.4' 
 'Cr'  'Cr'   0.3209   0.6236 
 'International Tables Vol C Tables 4.2.6.8 and 6.1.1.4' 
 
_symmetry_cell_setting            triclinic 
_symmetry_space_group_name_H-M    P-1 
 
loop_ 
 _symmetry_equiv_pos_as_xyz 
 'x, y, z' 
 '-x, -y, -z' 
 
_cell_length_a                    9.7448(6) 
_cell_length_b                    11.7879(7) 
_cell_length_c                    14.6524(11) 
_cell_angle_alpha                 70.8990(10) 
_cell_angle_beta                  70.6910(10) 
_cell_angle_gamma                 76.1150(10) 
_cell_volume                      1484.5(2) 
_cell_formula_units_Z             1 
_cell_measurement_temperature     110(2) 
_cell_measurement_reflns_used     7614 
_cell_measurement_theta_min       2.339 
_cell_measurement_theta_max       28.66 
 
_exptl_crystal_description        plate 
_exptl_crystal_colour             'orange yellow' 
_exptl_crystal_size_max           0.62 
_exptl_crystal_size_mid           0.56 
_exptl_crystal_size_min           0.21 
_exptl_crystal_density_meas       none 
_exptl_crystal_density_diffrn     1.223 
_exptl_crystal_density_method     none 
_exptl_crystal_F_000              588 
_exptl_absorpt_coefficient_mu     0.419 
_exptl_absorpt_correction_type    none 
_exptl_absorpt_correction_T_min   'not measured' 
_exptl_absorpt_correction_T_max   'not measured' 
 
_exptl_special_details 
; 
 ? 
; 
 
_diffrn_ambient_temperature       110(2) 
_diffrn_radiation_wavelength      0.71073 
_diffrn_radiation_type            MoK\a 
_diffrn_radiation_source          'fine-focus sealed tube' 
_diffrn_radiation_monochromator   graphite 
_diffrn_measurement_device        'Smart CCD' 
_diffrn_measurement_method        '\w scans' 
_diffrn_standards_number          none 
_diffrn_standards_interval_count  none 
_diffrn_standards_interval_time   none 
_diffrn_standards_decay_%         none 
_diffrn_reflns_number             26200 
_diffrn_reflns_av_R_equivalents   0.0433 
_diffrn_reflns_av_sigmaI/netI     0.0278 
_diffrn_reflns_limit_h_min        -13 
_diffrn_reflns_limit_h_max        13 
_diffrn_reflns_limit_k_min        -15 
_diffrn_reflns_limit_k_max        15 
_diffrn_reflns_limit_l_min        -19 
_diffrn_reflns_limit_l_max        19 
_diffrn_reflns_theta_min          1.53 
_diffrn_reflns_theta_max          28.71 
_reflns_number_total              6989 
_reflns_number_observed           6052 
_reflns_observed_criterion        >2sigma(I) 
 
_computing_data_collection        'Siemens XSCANS'
_computing_cell_refinement        'Siemens XSCANS'
_computing_data_reduction         'Siemens SHELXTL'
_computing_structure_solution     'SHELXS-86 (Sheldrick, 1990)' 
_computing_structure_refinement   'SHELXL-93 (Sheldrick, 1993)' 
_computing_molecular_graphics     'Siemens SHELXTL'
_computing_publication_material   'Ciftab'
 
_refine_special_details 
; 
 Refinement on F^2^ for ALL reflections except for 0 with very negative F^2^ 
 or flagged by the user for potential systematic errors.  Weighted R-factors 
 wR and all goodnesses of fit S are based on F^2^, conventional R-factors R 
 are based on F, with F set to zero for negative F^2^. The observed criterion 
 of F^2^ > 2sigma(F^2^) is used only for calculating _R_factor_obs etc. and is 
 not relevant to the choice of reflections for refinement.  R-factors based 
 on F^2^ are statistically about twice as large as those based on F, and R- 
 factors based on ALL data will be even larger. 
; 
 
_refine_ls_structure_factor_coef  Fsqd  
_refine_ls_matrix_type            full 
_refine_ls_weighting_scheme 
 'calc w=1/[\s^2^(Fo^2^)+(0.1092P)^2^+0.3057P] where P=(Fo^2^+2Fc^2^)/3' 
_atom_sites_solution_primary      direct 
_atom_sites_solution_secondary    difmap 
_atom_sites_solution_hydrogens    geom 
_refine_ls_hydrogen_treatment     ref 
_refine_ls_extinction_method      none 
_refine_ls_extinction_coef        ? 
_refine_ls_number_reflns          6989 
_refine_ls_number_parameters      510 
_refine_ls_number_restraints      0 
_refine_ls_R_factor_all           0.0648 
_refine_ls_R_factor_obs           0.0590 
_refine_ls_wR_factor_all          0.1597 
_refine_ls_wR_factor_obs          0.1519 
_refine_ls_goodness_of_fit_all    1.135 
_refine_ls_goodness_of_fit_obs    1.167 
_refine_ls_restrained_S_all       1.135 
_refine_ls_restrained_S_obs       1.167 
_refine_ls_shift/esd_max          0.085 
_refine_ls_shift/esd_mean         0.012 
 
loop_ 
 _atom_site_label 
 _atom_site_type_symbol 
 _atom_site_fract_x 
 _atom_site_fract_y 
 _atom_site_fract_z 
 _atom_site_U_iso_or_equiv 
 _atom_site_thermal_displace_type 
 _atom_site_occupancy 
 _atom_site_calc_flag 
 _atom_site_refinement_flags 
 _atom_site_disorder_group 
Cr1 Cr 0.91060(3) 0.54995(2) 0.52977(2) 0.01867(12) Uani 1 d . . 
O11 O 0.97799(13) 0.37521(11) 0.41796(9) 0.0214(3) Uani 1 d . . 
O12 O 0.77849(13) 0.49051(11) 0.48389(9) 0.0205(3) Uani 1 d . . 
O21 O 1.06861(13) 0.31238(10) 0.59333(9) 0.0211(3) Uani 1 d . . 
O22 O 0.86213(13) 0.42018(11) 0.65763(9) 0.0211(3) Uani 1 d . . 
C101 C 0.8402(2) 0.41016(15) 0.43771(12) 0.0206(3) Uani 1 d . . 
C102 C 0.7464(2) 0.35353(15) 0.40664(13) 0.0203(3) Uani 1 d . . 
C103 C 0.7586(2) 0.3756(2) 0.30453(13) 0.0220(3) Uani 1 d . . 
C104 C 0.6663(2) 0.3238(2) 0.27865(13) 0.0237(4) Uani 1 d . . 
H4C H 0.6733(27) 0.3302(23) 0.2133(20) 0.037(6) Uiso 1 d . . 
C105 C 0.5659(2) 0.2512(2) 0.35114(13) 0.0226(3) Uani 1 d . . 
C106 C 0.5585(2) 0.2305(2) 0.45231(14) 0.0234(3) Uani 1 d . . 
H6 H 0.4878(25) 0.1780(20) 0.5039(17) 0.027(5) Uiso 1 d . . 
C107 C 0.6466(2) 0.2803(2) 0.48201(13) 0.0224(3) Uani 1 d . . 
C108 C 0.8692(2) 0.4518(2) 0.22269(14) 0.0253(4) Uani 1 d . . 
H8 H 0.9028(25) 0.4988(20) 0.2537(17) 0.027(5) Uiso 1 d . . 
C109 C 1.0000(2) 0.3698(2) 0.1725(2) 0.0348(4) Uani 1 d . . 
H9C H 0.9715(28) 0.3318(23) 0.1425(19) 0.033(6) Uiso 1 d . . 
H9B H 1.0748(35) 0.4088(28) 0.1264(24) 0.057(8) Uiso 1 d . . 
H9A H 1.0550(29) 0.3112(24) 0.2205(20) 0.041(7) Uiso 1 d . . 
C110 C 0.8002(2) 0.5485(2) 0.1452(2) 0.0321(4) Uani 1 d . . 
H10C H 0.8674(32) 0.6018(25) 0.0992(22) 0.045(7) Uiso 1 d . . 
H10B H 0.7687(31) 0.5102(27) 0.1105(23) 0.048(8) Uiso 1 d . . 
H10A H 0.7147(32) 0.5952(25) 0.1801(22) 0.044(7) Uiso 1 d . . 
C111 C 0.4624(2) 0.1947(2) 0.32617(14) 0.0241(4) Uani 1 d . . 
H11 H 0.4646(23) 0.1124(20) 0.3659(17) 0.021(5) Uiso 1 d . . 
C112 C 0.5035(2) 0.1936(2) 0.21689(15) 0.0301(4) Uani 1 d . . 
H12C H 0.6089(27) 0.1565(21) 0.1923(18) 0.030(6) Uiso 1 d . . 
H12B H 0.4892(27) 0.2779(24) 0.1739(19) 0.034(6) Uiso 1 d . . 
H12A H 0.4373(32) 0.1550(25) 0.2060(21) 0.046(7) Uiso 1 d . . 
C113 C 0.3041(2) 0.2590(2) 0.3579(2) 0.0317(4) Uani 1 d . . 
H13A H 0.3007(33) 0.3408(29) 0.3167(24) 0.055(8) Uiso 1 d . . 
H13C H 0.2721(27) 0.2530(22) 0.4353(20) 0.034(6) Uiso 1 d . . 
H13B H 0.2403(36) 0.2211(29) 0.3469(25) 0.062(9) Uiso 1 d . . 
C114 C 0.6344(2) 0.2553(2) 0.59307(13) 0.0246(4) Uani 1 d . . 
H14 H 0.7265(23) 0.2702(19) 0.5934(16) 0.019(5) Uiso 1 d . . 
C115 C 0.5043(3) 0.3405(2) 0.6408(2) 0.0360(5) Uani 1 d . . 
H15C H 0.4117(28) 0.3178(22) 0.6345(18) 0.034(6) Uiso 1 d . . 
H15B H 0.5053(27) 0.3179(23) 0.7086(21) 0.035(6) Uiso 1 d . . 
H15A H 0.5186(28) 0.4231(25) 0.6090(20) 0.038(7) Uiso 1 d . . 
C116 C 0.6188(2) 0.1231(2) 0.6520(2) 0.0328(4) Uani 1 d . . 
H16C H 0.6315(27) 0.1134(22) 0.7156(20) 0.036(6) Uiso 1 d . . 
H16B H 0.5189(30) 0.1019(24) 0.6574(20) 0.040(7) Uiso 1 d . . 
H16A H 0.6993(35) 0.0654(28) 0.6151(24) 0.060(9) Uiso 1 d . . 
C201 C 0.9512(2) 0.3214(2) 0.66344(12) 0.0207(3) Uani 1 d . . 
C202 C 0.9154(2) 0.2136(2) 0.75150(13) 0.0221(3) Uani 1 d . . 
C203 C 0.9634(2) 0.0940(2) 0.73842(13) 0.0235(3) Uani 1 d . . 
C204 C 0.9236(2) -0.0037(2) 0.82103(15) 0.0279(4) Uani 1 d . . 
H4A H 0.9527(30) -0.0823(26) 0.8149(21) 0.045(7) Uiso 1 d . . 
C205 C 0.8389(2) 0.0098(2) 0.91469(14) 0.0287(4) Uani 1 d . . 
C206 C 0.7937(2) 0.1269(2) 0.92588(14) 0.0291(4) Uani 1 d . . 
H6A H 0.7314(29) 0.1445(23) 0.9881(21) 0.040(7) Uiso 1 d . . 
C207 C 0.8302(2) 0.2299(2) 0.84660(14) 0.0250(4) Uani 1 d . . 
C208 C 1.0601(2) 0.0654(2) 0.64014(14) 0.0255(4) Uani 1 d . . 
H8A H 1.0417(23) 0.1329(20) 0.5851(17) 0.023(5) Uiso 1 d . . 
C209 C 1.2227(2) 0.0541(2) 0.6344(2) 0.0314(4) Uani 1 d . . 
H9F H 1.2414(27) 0.1268(23) 0.6413(18) 0.033(6) Uiso 1 d . . 
H9E H 1.2847(26) 0.0393(21) 0.5721(19) 0.030(6) Uiso 1 d . . 
H9D H 1.2395(29) -0.0133(25) 0.6926(21) 0.044(7) Uiso 1 d . . 
C210 C 1.0342(2) -0.0513(2) 0.6269(2) 0.0320(4) Uani 1 d . . 
H12F H 1.0862(33) -0.0553(27) 0.5561(24) 0.053(8) Uiso 1 d . . 
H12E H 1.0777(28) -0.1262(24) 0.6702(20) 0.040(7) Uiso 1 d . . 
H10D H 0.9268(28) -0.0509(21) 0.6421(18) 0.033(6) Uiso 1 d . . 
C211 C 0.7973(2) -0.1034(2) 0.99988(15) 0.0317(4) Uani 1 d . . 
H11 H 0.8867(40) -0.1676(33) 1.0068(28) 0.079(11) Uiso 1 d . . 
C212 C 0.6766(3) -0.1499(3) 0.9840(2) 0.0539(7) Uani 1 d . . 
H12E H 0.6479(35) -0.2226(31) 1.0415(26) 0.066(9) Uiso 1 d . . 
H12F H 0.5932(33) -0.0860(30) 0.9915(23) 0.052(8) Uiso 1 d . . 
C213 C 0.7615(4) -0.0875(2) 1.1036(2) 0.0517(7) Uani 1 d . . 
H13E H 0.7514(32) -0.1677(28) 1.1541(23) 0.053(8) Uiso 1 d . . 
H13D H 0.8372(40) -0.0576(33) 1.1051(27) 0.072(10) Uiso 1 d . . 
C214 C 0.7786(2) 0.3534(2) 0.86943(14) 0.0270(4) Uani 1 d . . 
H14A H 0.8401(23) 0.4113(19) 0.8183(16) 0.019(5) Uiso 1 d . . 
C215 C 0.7924(3) 0.3502(2) 0.9713(2) 0.0372(5) Uani 1 d . . 
H15F H 0.7345(28) 0.3064(23) 1.0212(20) 0.030(6) Uiso 1 d . . 
H15E H 0.7672(28) 0.4285(25) 0.9750(19) 0.037(6) Uiso 1 d . . 
H15D H 0.8832(38) 0.3206(29) 0.9805(25) 0.061(9) Uiso 1 d . . 
C216 C 0.6200(3) 0.4004(2) 0.8644(2) 0.0379(5) Uani 1 d . . 
H16F H 0.5633(27) 0.3471(23) 0.9088(20) 0.032(6) Uiso 1 d . . 
H16E H 0.5885(30) 0.4771(26) 0.8763(21) 0.046(7) Uiso 1 d . . 
H16D H 0.6023(29) 0.4078(24) 0.7972(21) 0.042(7) Uiso 1 d . . 
 
loop_ 
 _atom_site_aniso_label 
 _atom_site_aniso_U_11 
 _atom_site_aniso_U_22 
 _atom_site_aniso_U_33 
 _atom_site_aniso_U_23 
 _atom_site_aniso_U_13 
 _atom_site_aniso_U_12 
Cr1 0.0210(2) 0.0179(2) 0.0179(2) -0.00466(11) -0.00598(11) -0.00383(11) 
O11 0.0214(6) 0.0210(6) 0.0234(6) -0.0072(5) -0.0070(5) -0.0032(4) 
O12 0.0221(6) 0.0200(6) 0.0205(6) -0.0061(5) -0.0060(5) -0.0039(4) 
O21 0.0237(6) 0.0178(6) 0.0206(6) -0.0048(5) -0.0046(5) -0.0035(4) 
O22 0.0231(6) 0.0201(6) 0.0190(6) -0.0051(5) -0.0051(5) -0.0029(5) 
C101 0.0246(8) 0.0187(8) 0.0176(7) -0.0014(6) -0.0068(6) -0.0054(6) 
C102 0.0201(8) 0.0194(7) 0.0222(8) -0.0077(6) -0.0059(6) -0.0014(6) 
C103 0.0239(8) 0.0201(8) 0.0218(8) -0.0062(6) -0.0053(7) -0.0032(6) 
C104 0.0269(9) 0.0240(8) 0.0212(8) -0.0071(7) -0.0079(7) -0.0027(7) 
C105 0.0219(8) 0.0228(8) 0.0254(8) -0.0098(7) -0.0076(7) -0.0015(6) 
C106 0.0222(8) 0.0245(8) 0.0240(8) -0.0074(7) -0.0046(7) -0.0053(6) 
C107 0.0231(8) 0.0205(8) 0.0229(8) -0.0074(7) -0.0056(7) -0.0010(6) 
C108 0.0301(9) 0.0260(9) 0.0221(8) -0.0056(7) -0.0071(7) -0.0100(7) 
C109 0.0300(10) 0.0327(10) 0.0338(11) -0.0051(9) -0.0002(9) -0.0078(8) 
C110 0.0367(11) 0.0301(10) 0.0273(9) -0.0031(8) -0.0087(8) -0.0078(8) 
C111 0.0232(8) 0.0243(9) 0.0279(9) -0.0083(7) -0.0088(7) -0.0049(6) 
C112 0.0309(10) 0.0374(11) 0.0301(10) -0.0142(8) -0.0107(8) -0.0093(8) 
C113 0.0240(9) 0.0373(11) 0.0366(11) -0.0108(9) -0.0099(8) -0.0062(8) 
C114 0.0270(9) 0.0277(9) 0.0213(8) -0.0057(7) -0.0070(7) -0.0089(7) 
C115 0.0402(12) 0.0414(12) 0.0256(10) -0.0137(9) -0.0048(8) -0.0044(9) 
C116 0.0395(11) 0.0312(10) 0.0270(10) 0.0004(8) -0.0129(8) -0.0104(8) 
C201 0.0231(8) 0.0220(8) 0.0204(8) -0.0066(6) -0.0081(6) -0.0050(6) 
C202 0.0238(8) 0.0214(8) 0.0222(8) -0.0037(6) -0.0087(7) -0.0050(6) 
C203 0.0252(8) 0.0225(8) 0.0237(8) -0.0040(7) -0.0102(7) -0.0035(6) 
C204 0.0345(10) 0.0214(9) 0.0278(9) -0.0035(7) -0.0112(8) -0.0045(7) 
C205 0.0351(10) 0.0262(9) 0.0240(9) -0.0010(7) -0.0097(8) -0.0092(7) 
C206 0.0349(10) 0.0298(9) 0.0228(9) -0.0061(7) -0.0055(7) -0.0098(8) 
C207 0.0268(9) 0.0271(9) 0.0235(8) -0.0068(7) -0.0079(7) -0.0070(7) 
C208 0.0299(9) 0.0214(8) 0.0248(9) -0.0052(7) -0.0091(7) -0.0022(7) 
C209 0.0291(10) 0.0267(9) 0.0356(11) -0.0078(8) -0.0083(8) -0.0010(7) 
C210 0.0393(11) 0.0244(9) 0.0325(10) -0.0093(8) -0.0082(9) -0.0054(8) 
C211 0.0393(11) 0.0260(9) 0.0262(9) -0.0004(7) -0.0085(8) -0.0082(8) 
C212 0.062(2) 0.0424(14) 0.059(2) 0.0143(12) -0.0316(14) -0.0284(13) 
C213 0.091(2) 0.0384(13) 0.0238(10) 0.0034(9) -0.0103(12) -0.0303(13) 
C214 0.0343(10) 0.0268(9) 0.0210(8) -0.0065(7) -0.0043(7) -0.0109(7) 
C215 0.0549(14) 0.0368(11) 0.0227(10) -0.0089(8) -0.0056(9) -0.0180(10) 
C216 0.0343(11) 0.0336(11) 0.0440(13) -0.0149(10) -0.0049(9) -0.0040(9) 
 
_geom_special_details 
; 
 All esds (except the esd in the dihedral angle between two l.s. planes) 
 are estimated using the full covariance matrix.  The cell esds are taken 
 into account individually in the estimation of esds in distances, angles 
 and torsion angles; correlations between esds in cell parameters are only 
 used when they are defined by crystal symmetry.  An approximate (isotropic) 
 treatment of cell esds is used for estimating esds involving l.s. planes. 
; 
 
loop_ 
 _geom_bond_atom_site_label_1 
 _geom_bond_atom_site_label_2 
 _geom_bond_distance 
 _geom_bond_site_symmetry_2 
 _geom_bond_publ_flag 
Cr1 Cr1 1.9663(5) 2_766 ? 
Cr1 O12 1.9783(12) . ? 
Cr1 O21 1.9820(12) 2_766 ? 
Cr1 O22 1.9897(12) . ? 
Cr1 O11 1.9988(12) 2_766 ? 
O11 C101 1.270(2) . ? 
O11 Cr1 1.9988(12) 2_766 ? 
O12 C101 1.262(2) . ? 
O21 C201 1.270(2) . ? 
O21 Cr1 1.9820(12) 2_766 ? 
O22 C201 1.270(2) . ? 
C101 C102 1.501(2) . ? 
C102 C103 1.401(2) . ? 
C102 C107 1.407(2) . ? 
C103 C104 1.403(2) . ? 
C103 C108 1.520(2) . ? 
C104 C105 1.392(3) . ? 
C104 H4C 0.92(3) . ? 
C105 C106 1.401(2) . ? 
C105 C111 1.523(2) . ? 
C106 C107 1.389(2) . ? 
C106 H6 0.99(2) . ? 
C107 C114 1.524(2) . ? 
C108 C110 1.527(3) . ? 
C108 C109 1.534(3) . ? 
C108 H8 0.99(2) . ? 
C109 H9C 0.86(3) . ? 
C109 H9B 0.91(3) . ? 
C109 H9A 1.01(3) . ? 
C110 H10C 0.95(3) . ? 
C110 H10B 0.94(3) . ? 
C110 H10A 0.97(3) . ? 
C111 C112 1.520(3) . ? 
C111 C113 1.537(3) . ? 
C111 H11 0.95(2) . ? 
C112 H12C 1.01(2) . ? 
C112 H12B 0.99(3) . ? 
C112 H12A 0.95(3) . ? 
C113 H13A 0.96(3) . ? 
C113 H13C 1.05(3) . ? 
C113 H13B 0.93(3) . ? 
C114 C116 1.531(3) . ? 
C114 C115 1.539(3) . ? 
C114 H14 0.96(2) . ? 
C115 H15C 1.04(3) . ? 
C115 H15B 0.94(3) . ? 
C115 H15A 0.95(3) . ? 
C116 H16C 0.95(3) . ? 
C116 H16B 1.03(3) . ? 
C116 H16A 1.04(3) . ? 
C201 C202 1.498(2) . ? 
C202 C207 1.415(2) . ? 
C202 C203 1.431(2) . ? 
C203 C204 1.391(3) . ? 
C203 C208 1.531(2) . ? 
C204 C205 1.386(3) . ? 
C204 H4A 0.93(3) . ? 
C205 C206 1.392(3) . ? 
C205 C211 1.529(3) . ? 
C206 C207 1.400(3) . ? 
C206 H6A 0.97(3) . ? 
C207 C214 1.529(3) . ? 
C208 C209 1.534(3) . ? 
C208 C210 1.538(3) . ? 
C208 H8A 0.96(2) . ? 
C209 H9F 0.96(3) . ? 
C209 H9E 0.96(2) . ? 
C209 H9D 0.99(3) . ? 
C210 H12F 1.00(3) . ? 
C210 H12E 1.00(3) . ? 
C210 H10D 0.99(2) . ? 
C211 C213 1.507(3) . ? 
C211 C212 1.521(3) . ? 
C211 H11 1.02(4) . ? 
C212 H12E 1.00(3) . ? 
C212 H12F 0.97(3) . ? 
C213 H13E 0.99(3) . ? 
C213 H13D 0.90(4) . ? 
C214 C216 1.529(3) . ? 
C214 C215 1.531(3) . ? 
C214 H14A 0.98(2) . ? 
C215 H15F 0.86(3) . ? 
C215 H15E 0.91(3) . ? 
C215 H15D 0.91(3) . ? 
C216 H16F 0.89(3) . ? 
C216 H16E 0.94(3) . ? 
C216 H16D 1.03(3) . ? 
 
loop_ 
 _geom_angle_atom_site_label_1 
 _geom_angle_atom_site_label_2 
 _geom_angle_atom_site_label_3 
 _geom_angle 
 _geom_angle_site_symmetry_1 
 _geom_angle_site_symmetry_3 
 _geom_angle_publ_flag 
Cr1 Cr1 O12 94.68(4) 2_766 . ? 
Cr1 Cr1 O21 93.37(4) 2_766 2_766 ? 
O12 Cr1 O21 89.15(5) . 2_766 ? 
Cr1 Cr1 O22 93.39(4) 2_766 . ? 
O12 Cr1 O22 87.28(5) . . ? 
O21 Cr1 O22 172.58(5) 2_766 . ? 
Cr1 Cr1 O11 92.51(4) 2_766 2_766 ? 
O12 Cr1 O11 172.76(5) . 2_766 ? 
O21 Cr1 O11 89.63(5) 2_766 2_766 ? 
O22 Cr1 O11 93.11(5) . 2_766 ? 
C101 O11 Cr1 115.67(11) . 2_766 ? 
C101 O12 Cr1 114.98(11) . . ? 
C201 O21 Cr1 116.37(11) . 2_766 ? 
C201 O22 Cr1 116.09(11) . . ? 
O12 C101 O11 122.1(2) . . ? 
O12 C101 C102 118.55(15) . . ? 
O11 C101 C102 119.37(14) . . ? 
C103 C102 C107 121.7(2) . . ? 
C103 C102 C101 119.79(15) . . ? 
C107 C102 C101 118.48(15) . . ? 
C102 C103 C104 118.1(2) . . ? 
C102 C103 C108 121.9(2) . . ? 
C104 C103 C108 120.0(2) . . ? 
C105 C104 C103 121.8(2) . . ? 
C105 C104 H4C 115.7(16) . . ? 
C103 C104 H4C 122.3(16) . . ? 
C104 C105 C106 118.2(2) . . ? 
C104 C105 C111 123.4(2) . . ? 
C106 C105 C111 118.4(2) . . ? 
C107 C106 C105 122.3(2) . . ? 
C107 C106 H6 119.5(13) . . ? 
C105 C106 H6 118.2(13) . . ? 
C106 C107 C102 117.9(2) . . ? 
C106 C107 C114 120.4(2) . . ? 
C102 C107 C114 121.7(2) . . ? 
C103 C108 C110 112.6(2) . . ? 
C103 C108 C109 110.3(2) . . ? 
C110 C108 C109 111.3(2) . . ? 
C103 C108 H8 108.2(13) . . ? 
C110 C108 H8 104.0(13) . . ? 
C109 C108 H8 110.3(13) . . ? 
C108 C109 H9C 110.3(17) . . ? 
C108 C109 H9B 115.2(19) . . ? 
H9C C109 H9B 107.1(25) . . ? 
C108 C109 H9A 113.2(15) . . ? 
H9C C109 H9A 110.7(22) . . ? 
H9B C109 H9A 99.8(24) . . ? 
C108 C110 H10C 111.7(17) . . ? 
C108 C110 H10B 109.0(18) . . ? 
H10C C110 H10B 110.1(24) . . ? 
C108 C110 H10A 108.7(17) . . ? 
H10C C110 H10A 109.1(23) . . ? 
H10B C110 H10A 108.1(23) . . ? 
C112 C111 C105 114.6(2) . . ? 
C112 C111 C113 110.4(2) . . ? 
C105 C111 C113 109.53(15) . . ? 
C112 C111 H11 107.4(13) . . ? 
C105 C111 H11 107.5(13) . . ? 
C113 C111 H11 107.1(13) . . ? 
C111 C112 H12C 112.5(13) . . ? 
C111 C112 H12B 109.8(14) . . ? 
H12C C112 H12B 108.4(19) . . ? 
C111 C112 H12A 111.0(17) . . ? 
H12C C112 H12A 111.5(20) . . ? 
H12B C112 H12A 103.2(21) . . ? 
C111 C113 H13A 107.4(18) . . ? 
C111 C113 H13C 110.5(13) . . ? 
H13A C113 H13C 112.9(22) . . ? 
C111 C113 H13B 109.6(20) . . ? 
H13A C113 H13B 109.1(26) . . ? 
H13C C113 H13B 107.3(23) . . ? 
C107 C114 C116 112.9(2) . . ? 
C107 C114 C115 110.2(2) . . ? 
C116 C114 C115 109.9(2) . . ? 
C107 C114 H14 104.1(13) . . ? 
C116 C114 H14 107.7(12) . . ? 
C115 C114 H14 111.9(12) . . ? 
C114 C115 H15C 104.9(14) . . ? 
C114 C115 H15B 103.9(15) . . ? 
H15C C115 H15B 110.8(20) . . ? 
C114 C115 H15A 110.3(16) . . ? 
H15C C115 H15A 114.9(20) . . ? 
H15B C115 H15A 111.3(22) . . ? 
C114 C116 H16C 106.1(15) . . ? 
C114 C116 H16B 111.7(15) . . ? 
H16C C116 H16B 112.5(21) . . ? 
C114 C116 H16A 109.9(17) . . ? 
H16C C116 H16A 110.2(22) . . ? 
H16B C116 H16A 106.4(22) . . ? 
O21 C201 O22 120.3(2) . . ? 
O21 C201 C202 119.62(15) . . ? 
O22 C201 C202 120.05(15) . . ? 
C207 C202 C203 120.0(2) . . ? 
C207 C202 C201 120.2(2) . . ? 
C203 C202 C201 119.8(2) . . ? 
C204 C203 C202 118.2(2) . . ? 
C204 C203 C208 117.4(2) . . ? 
C202 C203 C208 124.5(2) . . ? 
C205 C204 C203 123.0(2) . . ? 
C205 C204 H4A 116.8(17) . . ? 
C203 C204 H4A 120.2(17) . . ? 
C204 C205 C206 117.9(2) . . ? 
C204 C205 C211 118.9(2) . . ? 
C206 C205 C211 123.2(2) . . ? 
C205 C206 C207 122.5(2) . . ? 
C205 C206 H6A 123.1(15) . . ? 
C207 C206 H6A 114.3(15) . . ? 
C206 C207 C202 118.4(2) . . ? 
C206 C207 C214 117.5(2) . . ? 
C202 C207 C214 124.0(2) . . ? 
C203 C208 C209 109.7(2) . . ? 
C203 C208 C210 113.7(2) . . ? 
C209 C208 C210 108.9(2) . . ? 
C203 C208 H8A 108.5(13) . . ? 
C209 C208 H8A 106.4(13) . . ? 
C210 C208 H8A 109.4(13) . . ? 
C208 C209 H9F 110.1(15) . . ? 
C208 C209 H9E 110.8(14) . . ? 
H9F C209 H9E 109.8(20) . . ? 
C208 C209 H9D 105.9(16) . . ? 
H9F C209 H9D 108.2(21) . . ? 
H9E C209 H9D 111.9(20) . . ? 
C208 C210 H12F 108.9(17) . . ? 
C208 C210 H12E 112.5(15) . . ? 
H12F C210 H12E 105.2(22) . . ? 
C208 C210 H10D 109.4(14) . . ? 
H12F C210 H10D 111.0(22) . . ? 
H12E C210 H10D 109.8(20) . . ? 
C213 C211 C212 113.2(2) . . ? 
C213 C211 C205 114.3(2) . . ? 
C212 C211 C205 109.3(2) . . ? 
C213 C211 H11 95.0(21) . . ? 
C212 C211 H11 112.9(20) . . ? 
C205 C211 H11 111.5(21) . . ? 
C211 C212 H12E 108.6(18) . . ? 
C211 C212 H12F 103.9(17) . . ? 
H12E C212 H12F 106.0(26) . . ? 
C211 C213 H13E 109.4(18) . . ? 
C211 C213 H13D 106.7(23) . . ? 
H13E C213 H13D 110.1(27) . . ? 
C207 C214 C216 110.5(2) . . ? 
C207 C214 C215 112.7(2) . . ? 
C216 C214 C215 110.0(2) . . ? 
C207 C214 H14A 108.6(12) . . ? 
C216 C214 H14A 107.6(12) . . ? 
C215 C214 H14A 107.2(12) . . ? 
C214 C215 H15F 113.1(16) . . ? 
C214 C215 H15E 105.6(16) . . ? 
H15F C215 H15E 108.7(23) . . ? 
C214 C215 H15D 114.9(21) . . ? 
H15F C215 H15D 104.8(26) . . ? 
H15E C215 H15D 109.6(25) . . ? 
C214 C216 H16F 108.6(16) . . ? 
C214 C216 H16E 111.1(17) . . ? 
H16F C216 H16E 111.2(23) . . ? 
C214 C216 H16D 114.8(15) . . ? 
H16F C216 H16D 104.1(21) . . ? 
H16E C216 H16D 106.9(22) . . ? 
 
_refine_diff_density_max    2.212 
_refine_diff_density_min   -0.417 
_refine_diff_density_rms    0.106 

#===END
 
data_xl_compound_2 
 
_audit_creation_method            SHELXL 
_chemical_name_systematic 
; 
 Cr2(TPB)4(CH3CN)2,1.5CH2Cl2 
; 
_chemical_name_common             ? 
_chemical_formula_moiety          'Cr2 (C16 H23 O2)4 (C2 H3 N)2,1.5(C H2 Cl2)' 
_chemical_formula_structural      'Cr2 (TPB)4 (CH3CN)2,1.5(CH2Cl2)' 
_chemical_formula_analytical      'not measured' 
_chemical_formula_sum             'C69.50 H101 Cl3 Cr2 N2 O8' 
_chemical_formula_weight          1302.87 
_chemical_melting_point           'not measured' 
_chemical_compound_source         synthesized 
 
loop_ 
 _atom_type_symbol 
 _atom_type_description 
 _atom_type_scat_dispersion_real 
 _atom_type_scat_dispersion_imag 
 _atom_type_scat_source 
 'C'  'C'   0.0033   0.0016 
 'International Tables Vol C Tables 4.2.6.8 and 6.1.1.4' 
 'H'  'H'   0.0000   0.0000 
 'International Tables Vol C Tables 4.2.6.8 and 6.1.1.4' 
 'N'  'N'   0.0061   0.0033 
 'International Tables Vol C Tables 4.2.6.8 and 6.1.1.4' 
 'O'  'O'   0.0106   0.0060 
 'International Tables Vol C Tables 4.2.6.8 and 6.1.1.4' 
 'Cr'  'Cr'   0.3209   0.6236 
 'International Tables Vol C Tables 4.2.6.8 and 6.1.1.4' 
 'Cl'  'Cl'   0.1484   0.1585 
 'International Tables Vol C Tables 4.2.6.8 and 6.1.1.4' 
 
_symmetry_cell_setting            triclinic 
_symmetry_space_group_name_H-M    p-1 
 
loop_ 
 _symmetry_equiv_pos_as_xyz 
 'x, y, z' 
 '-x, -y, -z' 
 
_cell_length_a                    14.445(2) 
_cell_length_b                    16.618(2) 
_cell_length_c                    17.529(2) 
_cell_angle_alpha                 65.918(2) 
_cell_angle_beta                  74.912(2) 
_cell_angle_gamma                 82.713(3) 
_cell_volume                      3708.1(9) 
_cell_formula_units_Z             2 
_cell_measurement_temperature     213(2) 
_cell_measurement_reflns_used     8188 
_cell_measurement_theta_min       2.48 
_cell_measurement_theta_max       27.29 
 
_exptl_crystal_description        block 
_exptl_crystal_colour             red 
_exptl_crystal_size_max           0.46 
_exptl_crystal_size_mid           0.41 
_exptl_crystal_size_min           0.39 
_exptl_crystal_density_meas       'not measured' 
_exptl_crystal_density_diffrn     1.167 
_exptl_crystal_density_method     none 
_exptl_crystal_F_000              1390 
_exptl_absorpt_coefficient_mu     0.451 
_exptl_absorpt_correction_type    multi-scan 
_exptl_absorpt_correction_T_min   0.55 
_exptl_absorpt_correction_T_max   0.69 
 
_exptl_special_details 
; 
 ? 
; 
 
_diffrn_ambient_temperature       213(2) 
_diffrn_radiation_wavelength      0.71073 
_diffrn_radiation_type            MoK\a 
_diffrn_radiation_source          'normal-focus sealed tube' 
_diffrn_radiation_monochromator   graphite 
_diffrn_measurement_device        'Bruker SMART CCD' 
_diffrn_measurement_method        'Ellipsoid-mask Fitting' 
_diffrn_standards_number          none 
_diffrn_standards_interval_count  none 
_diffrn_standards_interval_time   none 
_diffrn_standards_decay_%         none 
_diffrn_reflns_number             15829 
_diffrn_reflns_av_R_equivalents   0.0231 
_diffrn_reflns_av_sigmaI/netI     0.0489 
_diffrn_reflns_limit_h_min        -18 
_diffrn_reflns_limit_h_max        16 
_diffrn_reflns_limit_k_min        -15 
_diffrn_reflns_limit_k_max        22 
_diffrn_reflns_limit_l_min        -23 
_diffrn_reflns_limit_l_max        23 
_diffrn_reflns_theta_min          1.46 
_diffrn_reflns_theta_max          22.50 
_reflns_number_total              9653 
_reflns_number_observed           6586 
_reflns_observed_criterion        >2sigma(I) 
 
_computing_data_collection        ? 
_computing_cell_refinement        ? 
_computing_data_reduction         'SAINT'
_computing_structure_solution     'SHELXS-86 (Sheldrick, 1990)' 
_computing_structure_refinement   'SHELXL-93 (Sheldrick, 1993)' 
_computing_molecular_graphics     'SHELXTL V.5 (Siemens, 1994)'
_computing_publication_material   CIFTAB
 
_refine_special_details 
; 
 Refinement on F^2^ for ALL reflections except for 15 with very negative F^2^ 
 or flagged by the user for potential systematic errors.  Weighted R-factors 
 wR and all goodnesses of fit S are based on F^2^, conventional R-factors R 
 are based on F, with F set to zero for negative F^2^. The observed criterion 
 of F^2^ > 2sigma(F^2^) is used only for calculating _R_factor_obs etc. and is 
 not relevant to the choice of reflections for refinement.  R-factors based 
 on F^2^ are statistically about twice as large as those based on F, and R- 
 factors based on ALL data will be even larger. 
; 
 
_refine_ls_structure_factor_coef  Fsqd  
_refine_ls_matrix_type            full 
_refine_ls_weighting_scheme 
 'calc w=1/[\s^2^(Fo^2^)+(0.1858P)^2^+5.7332P] where P=(Fo^2^+2Fc^2^)/3' 
_atom_sites_solution_primary      direct 
_atom_sites_solution_secondary    difmap 
_atom_sites_solution_hydrogens    geom 
_refine_ls_hydrogen_treatment     calc 
_refine_ls_extinction_method      none 
_refine_ls_extinction_coef        ? 
_refine_ls_number_reflns          9638 
_refine_ls_number_parameters      698 
_refine_ls_number_restraints      23 
_refine_ls_R_factor_all           0.1191 
_refine_ls_R_factor_obs           0.0909 
_refine_ls_wR_factor_all          0.3019 
_refine_ls_wR_factor_obs          0.2656 
_refine_ls_goodness_of_fit_all    1.039 
_refine_ls_goodness_of_fit_obs    1.143 
_refine_ls_restrained_S_all       1.068 
_refine_ls_restrained_S_obs       1.147 
_refine_ls_shift/esd_max          -0.080 
_refine_ls_shift/esd_mean         0.006 
 
loop_ 
 _atom_site_label 
 _atom_site_type_symbol 
 _atom_site_fract_x 
 _atom_site_fract_y 
 _atom_site_fract_z 
 _atom_site_U_iso_or_equiv 
 _atom_site_thermal_displace_type 
 _atom_site_occupancy 
 _atom_site_calc_flag 
 _atom_site_refinement_flags 
 _atom_site_disorder_group 
Cr2 Cr 0.18773(7) -0.06017(6) -0.17814(6) 0.0359(3) Uani 1 d . . 
Cr1 Cr 0.26641(7) -0.03070(6) -0.32446(6) 0.0372(3) Uani 1 d . . 
N601 N 0.1160(4) -0.0951(4) -0.0337(4) 0.0561(15) Uani 1 d . . 
C601 C 0.0926(5) -0.1253(5) 0.0386(5) 0.059(2) Uani 1 d . . 
C602 C 0.0622(7) -0.1668(7) 0.1316(5) 0.095(3) Uani 1 d . . 
N501 N 0.3362(4) 0.0064(4) -0.4696(4) 0.059(2) Uani 1 d . . 
C501 C 0.3529(5) 0.0420(5) -0.5410(5) 0.054(2) Uani 1 d . . 
C502 C 0.3759(8) 0.0881(6) -0.6340(5) 0.092(3) Uani 1 d . . 
O401 O 0.3171(3) 0.0780(3) -0.3280(2) 0.0420(10) Uani 1 d . . 
O402 O 0.2706(3) 0.0331(2) -0.1855(2) 0.0408(10) Uani 1 d . . 
C401 C 0.3129(4) 0.0880(4) -0.2593(4) 0.0419(15) Uani 1 d . . 
C402 C 0.3566(4) 0.1676(4) -0.2652(4) 0.0434(15) Uani 1 d . . 
C403 C 0.3100(5) 0.2144(4) -0.2142(5) 0.057(2) Uani 1 d . . 
C404 C 0.3422(14) 0.3003(15) -0.2343(15) 0.066(6) Uiso 0.56(5) d PD 1 
C405 C 0.4257(15) 0.3337(14) -0.2985(15) 0.065(6) Uiso 0.56(5) d PD 1 
C406 C 0.4741(14) 0.2867(15) -0.3461(15) 0.062(6) Uiso 0.56(5) d PD 1 
C04' C 0.3579(17) 0.2834(17) -0.2161(17) 0.058(7) Uiso 0.44(5) d PD 2 
C05' C 0.4477(18) 0.3111(18) -0.2732(18) 0.063(7) Uiso 0.44(5) d PD 2 
C06' C 0.4917(16) 0.2663(17) -0.3243(17) 0.055(7) Uiso 0.44(5) d PD 2 
C407 C 0.4426(5) 0.1981(4) -0.3259(4) 0.055(2) Uiso 1 d . . 
C408 C 0.2054(28) 0.1882(17) -0.1547(20) 0.080(11) Uiso 0.43(7) d PD 1 
C409 C 0.2230(31) 0.1295(18) -0.0594(13) 0.067(9) Uiso 0.43(7) d PD 1 
C410 C 0.1463(18) 0.2752(21) -0.1537(29) 0.081(9) Uiso 0.43(7) d PD 1 
C48' C 0.2243(14) 0.1809(9) -0.1415(11) 0.041(6) Uiso 0.57(7) d PD 2 
C49' C 0.2574(24) 0.1158(12) -0.0562(10) 0.073(6) Uiso 0.57(7) d PD 2 
C40' C 0.1537(12) 0.2543(15) -0.1229(20) 0.071(7) Uiso 0.57(7) d PD 2 
C411 C 0.4563(20) 0.4213(15) -0.3123(16) 0.068(8) Uiso 0.34(2) d PD 1 
C412 C 0.5083(31) 0.4187(29) -0.2496(25) 0.135(15) Uiso 0.34(2) d PD 1 
C413 C 0.4077(25) 0.4917(21) -0.3623(21) 0.122(14) Uiso 0.34(2) d PD 1 
C41' C 0.4973(18) 0.3992(16) -0.2844(16) 0.136(7) Uiso 0.66(2) d PD 2 
C42' C 0.5579(18) 0.3638(16) -0.2209(15) 0.146(9) Uiso 0.66(2) d PD 2 
C43' C 0.5386(15) 0.4559(13) -0.3705(12) 0.126(8) Uiso 0.66(2) d PD 2 
C414 C 0.5021(5) 0.1497(5) -0.3802(5) 0.058(2) Uiso 1 d . . 
C415 C 0.6107(7) 0.1485(6) -0.3843(6) 0.085(3) Uiso 1 d . . 
C416 C 0.4848(7) 0.1920(6) -0.4722(6) 0.081(2) Uiso 1 d . . 
O201 O 0.2083(3) -0.1408(3) -0.3096(2) 0.0412(10) Uani 1 d . . 
O202 O 0.1107(3) -0.1492(2) -0.1842(2) 0.0396(10) Uani 1 d . . 
C201 C 0.1382(4) -0.1741(4) -0.2454(4) 0.0401(14) Uani 1 d . . 
C202 C 0.0860(4) -0.2487(4) -0.2434(4) 0.0415(15) Uani 1 d . . 
C203 C 0.0735(4) -0.3274(4) -0.1698(4) 0.047(2) Uani 1 d . . 
C204 C 0.0233(5) -0.3943(4) -0.1690(5) 0.061(2) Uani 1 d . . 
H20A H 0.0157(5) -0.4476(4) -0.1204(5) 0.073 Uiso 1 calc R . 
C205 C -0.0149(6) -0.3864(5) -0.2346(5) 0.070(2) Uani 1 d . . 
C206 C 0.0001(5) -0.3080(5) -0.3077(5) 0.063(2) Uani 1 d . . 
H20B H -0.0241(5) -0.3022(5) -0.3546(5) 0.076 Uiso 1 calc R . 
C207 C 0.0494(5) -0.2381(4) -0.3137(4) 0.049(2) Uani 1 d . . 
C208 C 0.1115(5) -0.3424(4) -0.0918(4) 0.049(2) Uani 1 d . . 
H20C H 0.1627(5) -0.2994(4) -0.1106(4) 0.059 Uiso 1 calc R . 
C209 C 0.1568(6) -0.4359(5) -0.0549(5) 0.068(2) Uani 1 d . . 
H20D H 0.2061(6) -0.4458(5) -0.0999(5) 0.102 Uiso 1 calc R . 
H20E H 0.1076(6) -0.4795(5) -0.0331(5) 0.102 Uiso 1 calc R . 
H20F H 0.1850(6) -0.4407(5) -0.0087(5) 0.102 Uiso 1 calc R . 
C210 C 0.0341(5) -0.3252(5) -0.0223(5) 0.065(2) Uani 1 d . . 
H21A H 0.0606(5) -0.3353(5) 0.0264(5) 0.097 Uiso 1 calc R . 
H21B H -0.0185(5) -0.3647(5) -0.0042(5) 0.097 Uiso 1 calc R . 
H21C H 0.0109(5) -0.2646(5) -0.0448(5) 0.097 Uiso 1 calc R . 
C211 C -0.0776(8) -0.4625(7) -0.2210(9) 0.071(4) Uiso 0.82(3) d PD 1 
C212 C -0.0110(10) -0.5332(8) -0.2420(11) 0.098(5) Uiso 0.82(3) d PD 1 
C213 C -0.1606(9) -0.4353(8) -0.2559(11) 0.086(4) Uiso 0.82(3) d PD 1 
C21' C -0.0497(28) -0.4480(25) -0.2720(34) 0.057(15) Uiso 0.18(3) d PD 2 
C22' C 0.0132(34) -0.5164(33) -0.2965(46) 0.091(20) Uiso 0.18(3) d PD 2 
C23' C -0.1408(28) -0.4264(29) -0.2947(39) 0.062(14) Uiso 0.18(3) d PD 2 
C214 C 0.0617(5) -0.1536(5) -0.3948(5) 0.061(2) Uiso 1 d . . 
C215 C -0.0158(17) -0.1342(10) -0.4441(13) 0.057(6) Uiso 0.63(7) d PD 1 
C216 C 0.1635(15) -0.1724(18) -0.4574(11) 0.070(6) Uiso 0.63(7) d PD 1 
C25' C -0.0459(29) -0.1260(18) -0.4225(25) 0.070(10) Uiso 0.37(7) d PD 2 
C26' C 0.1404(25) -0.1433(27) -0.4667(16) 0.059(9) Uiso 0.37(7) d PD 2 
O101 O 0.3809(3) -0.1004(3) -0.2809(2) 0.0427(10) Uani 1 d . . 
O102 O 0.2943(3) -0.1500(2) -0.1457(2) 0.0402(10) Uani 1 d . . 
C101 C 0.3715(4) -0.1450(4) -0.2014(4) 0.0384(14) Uani 1 d . . 
C102 C 0.4589(4) -0.1931(4) -0.1701(4) 0.0407(14) Uani 1 d . . 
C103 C 0.4977(4) -0.1639(4) -0.1206(4) 0.045(2) Uani 1 d . . 
C104 C 0.5777(5) -0.2088(4) -0.0916(4) 0.051(2) Uani 1 d . . 
H10A H 0.6036(5) -0.1900(4) -0.0578(4) 0.061 Uiso 1 calc R . 
C105 C 0.6209(5) -0.2798(4) -0.1102(4) 0.047(2) Uani 1 d . . 
C106 C 0.5808(5) -0.3058(4) -0.1594(4) 0.055(2) Uani 1 d . . 
H10B H 0.6081(5) -0.3548(4) -0.1718(4) 0.065 Uiso 1 calc R . 
C107 C 0.5019(5) -0.2630(4) -0.1914(4) 0.050(2) Uani 1 d . . 
C108 C 0.4551(5) -0.0840(4) -0.0997(5) 0.056(2) Uani 1 d . . 
C109 C 0.4064(13) -0.1079(15) -0.0075(17) 0.088(5) Uiso 0.79(8) d PD 1 
C110 C 0.5312(12) -0.0094(13) -0.1398(22) 0.101(6) Uiso 0.79(8) d PD 1 
C09' C 0.4245(39) -0.1290(37) 0.0174(39) 0.060(19) Uiso 0.21(8) d PD 2 
C10' C 0.5331(20) -0.0211(22) -0.1125(33) 0.026(17) Uiso 0.21(8) d PD 2 
C111 C 0.7079(6) -0.3284(5) -0.0778(5) 0.068(2) Uiso 1 d . . 
C112 C 0.7935(11) -0.2705(10) -0.1059(19) 0.069(6) Uiso 0.61(6) d PD 1 
C113 C 0.6699(22) -0.3702(14) 0.0322(17) 0.091(7) Uiso 0.61(6) d PD 1 
C12' C 0.7983(17) -0.2612(15) -0.1442(28) 0.071(10) Uiso 0.39(6) d PD 2 
C13' C 0.6997(24) -0.3573(15) 0.0104(19) 0.049(8) Uiso 0.39(6) d PD 2 
C114 C 0.4629(13) -0.2776(14) -0.2627(14) 0.093(7) Uiso 0.61(3) d PD 1 
C115 C 0.3817(11) -0.3423(11) -0.2051(10) 0.084(6) Uiso 0.61(3) d PD 1 
C116 C 0.5356(13) -0.3208(16) -0.3140(14) 0.100(8) Uiso 0.61(3) d PD 1 
C14' C 0.4595(10) -0.3053(11) -0.2370(11) 0.026(5) Uiso 0.39(3) d PD 2 
C15' C 0.4136(16) -0.4000(15) -0.1730(13) 0.073(9) Uiso 0.39(3) d PD 2 
C16' C 0.5468(15) -0.3442(18) -0.2930(16) 0.064(8) Uiso 0.39(3) d PD 2 
O301 O 0.1487(3) 0.0419(2) -0.3566(2) 0.0395(10) Uani 1 d . . 
O302 O 0.0924(3) 0.0366(3) -0.2231(2) 0.0405(10) Uani 1 d . . 
C301 C 0.0911(4) 0.0662(4) -0.3016(4) 0.0401(15) Uani 1 d . . 
C302 C 0.0186(5) 0.1390(4) -0.3317(4) 0.0436(15) Uani 1 d . . 
C303 C -0.0791(5) 0.1194(4) -0.3068(4) 0.050(2) Uani 1 d . . 
C304 C -0.1441(5) 0.1882(5) -0.3330(4) 0.057(2) Uani 1 d . . 
H30A H -0.2097(5) 0.1759(5) -0.3164(4) 0.068 Uiso 1 calc R . 
C305 C -0.1156(6) 0.2750(5) -0.3830(5) 0.064(2) Uani 1 d . . 
C306 C -0.0179(6) 0.2911(5) -0.4070(5) 0.063(2) Uani 1 d . . 
H30B H 0.0027(6) 0.3490(5) -0.4413(5) 0.076 Uiso 1 calc R . 
C307 C 0.0502(5) 0.2249(4) -0.3822(4) 0.051(2) Uiso 1 d . . 
C308 C -0.1119(6) 0.0246(5) -0.2538(5) 0.067(2) Uiso 1 d . . 
C309 C -0.2136(14) 0.0291(12) -0.1838(12) 0.093(7) Uiso 0.53(2) d PD 1 
C310 C -0.1124(20) -0.0198(16) -0.2992(14) 0.123(9) Uiso 0.53(2) d PD 1 
C30' C -0.1783(13) -0.0046(10) -0.2997(9) 0.056(5) Uiso 0.47(2) d PD 2 
C39' C -0.1474(16) -0.0052(14) -0.1645(12) 0.090(8) Uiso 0.47(2) d PD 2 
C311 C -0.2094(23) 0.3400(13) -0.3931(17) 0.084(8) Uiso 0.50(5) d PD 1 
C312 C -0.1955(24) 0.3834(18) -0.4985(14) 0.100(10) Uiso 0.50(5) d PD 1 
C313 C -0.1779(21) 0.4269(16) -0.3815(19) 0.087(8) Uiso 0.50(5) d PD 1 
C31' C -0.1790(16) 0.3515(11) -0.4162(12) 0.048(6) Uiso 0.50(5) d PD 2 
C32' C -0.1500(22) 0.4133(17) -0.5140(12) 0.096(9) Uiso 0.50(5) d PD 2 
C33' C -0.2008(23) 0.4062(20) -0.3565(17) 0.102(10) Uiso 0.50(5) d PD 2 
C314 C 0.1566(5) 0.2459(5) -0.4090(5) 0.059(2) Uiso 1 d . . 
C315 C 0.2031(12) 0.2429(18) -0.5010(9) 0.075(6) Uiso 0.62(5) d PD 1 
C316 C 0.1813(16) 0.3292(12) -0.4061(18) 0.083(6) Uiso 0.62(5) d PD 1 
C35' C 0.1871(20) 0.2862(31) -0.5087(14) 0.076(11) Uiso 0.38(5) d PD 2 
C36' C 0.1640(23) 0.3232(17) -0.3748(25) 0.071(9) Uiso 0.38(5) d PD 2 
C1S C 0.6517(11) 0.3422(7) -0.0299(8) 0.135(5) Uani 1 d . . 
Cl1S Cl 0.7513(3) 0.3287(3) -0.1037(3) 0.183(2) Uani 1 d . . 
Cl2S Cl 0.6133(3) 0.4477(3) -0.0562(3) 0.1617(15) Uani 1 d . . 
C2S C 0.7727(27) -0.6048(24) 0.3145(23) 0.181(13) Uiso 0.50 d P . 
Cl3S Cl 0.6655(12) -0.6285(10) 0.4145(10) 0.275(6) Uiso 0.50 d P . 
Cl4S Cl 0.7609(10) -0.4917(9) 0.2611(8) 0.243(5) Uiso 0.50 d P . 
 
loop_ 
 _atom_site_aniso_label 
 _atom_site_aniso_U_11 
 _atom_site_aniso_U_22 
 _atom_site_aniso_U_33 
 _atom_site_aniso_U_23 
 _atom_site_aniso_U_13 
 _atom_site_aniso_U_12 
Cr2 0.0337(6) 0.0406(6) 0.0320(5) -0.0145(4) -0.0020(4) -0.0065(4) 
Cr1 0.0345(6) 0.0440(6) 0.0331(6) -0.0165(4) -0.0015(4) -0.0095(4) 
N601 0.054(4) 0.068(4) 0.046(4) -0.025(3) -0.004(3) -0.009(3) 
C601 0.056(5) 0.078(5) 0.048(5) -0.033(4) 0.006(4) -0.020(4) 
C602 0.100(7) 0.133(8) 0.044(5) -0.035(5) 0.010(5) -0.029(6) 
N501 0.058(4) 0.072(4) 0.046(4) -0.029(3) 0.007(3) -0.018(3) 
C501 0.056(5) 0.065(4) 0.039(4) -0.025(4) 0.010(3) -0.019(4) 
C502 0.111(8) 0.097(7) 0.047(5) -0.014(4) 0.007(5) -0.031(6) 
O401 0.043(3) 0.049(2) 0.035(2) -0.016(2) -0.003(2) -0.015(2) 
O402 0.045(2) 0.042(2) 0.035(2) -0.015(2) -0.006(2) -0.010(2) 
C401 0.029(3) 0.051(4) 0.046(4) -0.019(3) -0.007(3) 0.000(3) 
C402 0.043(4) 0.045(4) 0.047(4) -0.023(3) -0.007(3) -0.009(3) 
C403 0.059(5) 0.055(4) 0.067(5) -0.035(4) -0.012(4) -0.006(3) 
O201 0.037(2) 0.046(2) 0.039(2) -0.019(2) 0.003(2) -0.012(2) 
O202 0.042(2) 0.042(2) 0.035(2) -0.017(2) -0.002(2) -0.011(2) 
C201 0.035(4) 0.039(3) 0.045(4) -0.013(3) -0.013(3) 0.001(3) 
C202 0.038(4) 0.034(3) 0.052(4) -0.020(3) -0.004(3) -0.005(3) 
C203 0.035(4) 0.045(4) 0.057(4) -0.021(3) -0.002(3) -0.004(3) 
C204 0.058(5) 0.042(4) 0.077(5) -0.015(4) -0.016(4) -0.010(3) 
C205 0.088(6) 0.042(4) 0.086(6) -0.020(4) -0.030(5) -0.017(4) 
C206 0.067(5) 0.057(4) 0.084(5) -0.039(4) -0.025(4) -0.010(4) 
C207 0.053(4) 0.047(4) 0.049(4) -0.022(3) -0.006(3) -0.009(3) 
C208 0.041(4) 0.042(4) 0.053(4) -0.010(3) -0.006(3) -0.006(3) 
C209 0.060(5) 0.058(4) 0.068(5) -0.007(4) -0.014(4) -0.001(4) 
C210 0.056(5) 0.071(5) 0.057(4) -0.019(4) -0.002(4) -0.008(4) 
O101 0.037(2) 0.053(3) 0.035(2) -0.017(2) -0.004(2) -0.003(2) 
O102 0.039(3) 0.045(2) 0.035(2) -0.015(2) -0.005(2) -0.005(2) 
C101 0.036(4) 0.043(3) 0.038(4) -0.019(3) -0.005(3) -0.008(3) 
C102 0.035(3) 0.042(3) 0.041(3) -0.016(3) -0.001(3) -0.006(3) 
C103 0.037(4) 0.056(4) 0.051(4) -0.030(3) -0.008(3) -0.002(3) 
C104 0.052(4) 0.053(4) 0.059(4) -0.028(3) -0.023(3) 0.000(3) 
C105 0.040(4) 0.050(4) 0.054(4) -0.024(3) -0.010(3) 0.000(3) 
C106 0.052(4) 0.055(4) 0.062(4) -0.033(4) -0.008(4) 0.003(3) 
C107 0.051(4) 0.053(4) 0.055(4) -0.029(3) -0.017(3) 0.005(3) 
C108 0.058(5) 0.057(4) 0.071(5) -0.039(4) -0.023(4) 0.005(3) 
O301 0.039(2) 0.046(2) 0.034(2) -0.018(2) -0.003(2) -0.005(2) 
O302 0.039(2) 0.046(2) 0.034(2) -0.015(2) -0.005(2) -0.001(2) 
C301 0.036(4) 0.036(3) 0.044(4) -0.011(3) -0.005(3) -0.013(3) 
C302 0.050(4) 0.042(3) 0.036(3) -0.013(3) -0.005(3) -0.006(3) 
C303 0.043(4) 0.058(4) 0.040(4) -0.009(3) -0.011(3) -0.007(3) 
C304 0.046(4) 0.075(5) 0.053(4) -0.027(4) -0.015(3) 0.004(4) 
C305 0.073(6) 0.067(5) 0.067(5) -0.037(4) -0.033(4) 0.018(4) 
C306 0.075(6) 0.045(4) 0.068(5) -0.019(4) -0.019(4) -0.004(4) 
C1S 0.188(14) 0.086(8) 0.107(8) -0.038(6) 0.018(9) -0.037(8) 
Cl1S 0.154(4) 0.156(3) 0.164(4) -0.011(3) 0.007(3) -0.015(3) 
Cl2S 0.172(4) 0.135(3) 0.171(4) -0.055(3) -0.025(3) -0.026(3) 
 
_geom_special_details 
; 
 All esds (except the esd in the dihedral angle between two l.s. planes) 
 are estimated using the full covariance matrix.  The cell esds are taken 
 into account individually in the estimation of esds in distances, angles 
 and torsion angles; correlations between esds in cell parameters are only 
 used when they are defined by crystal symmetry.  An approximate (isotropic) 
 treatment of cell esds is used for estimating esds involving l.s. planes. 
; 
 
loop_ 
 _geom_bond_atom_site_label_1 
 _geom_bond_atom_site_label_2 
 _geom_bond_distance 
 _geom_bond_site_symmetry_2 
 _geom_bond_publ_flag 
Cr2 O202 2.011(4) . ? 
Cr2 O302 2.017(4) . ? 
Cr2 O402 2.020(4) . ? 
Cr2 O102 2.025(4) . ? 
Cr2 N601 2.326(6) . ? 
Cr2 Cr1 2.3893(13) . ? 
Cr1 O201 2.002(4) . ? 
Cr1 O401 2.006(4) . ? 
Cr1 O301 2.021(4) . ? 
Cr1 O101 2.028(4) . ? 
Cr1 N501 2.325(6) . ? 
N601 C601 1.128(8) . ? 
C601 C602 1.453(11) . ? 
N501 C501 1.119(8) . ? 
C501 C502 1.455(11) . ? 
O401 C401 1.265(7) . ? 
O402 C401 1.284(7) . ? 
C401 C402 1.492(8) . ? 
C402 C407 1.402(9) . ? 
C402 C403 1.406(9) . ? 
C403 C04' 1.40(2) . ? 
C403 C404 1.43(2) . ? 
C403 C48' 1.50(2) . ? 
C403 C408 1.59(3) . ? 
C404 C405 1.41(2) . ? 
C405 C406 1.37(2) . ? 
C405 C411 1.48(3) . ? 
C406 C407 1.47(2) . ? 
C04' C05' 1.41(2) . ? 
C05' C06' 1.38(2) . ? 
C05' C41' 1.63(3) . ? 
C06' C407 1.42(2) . ? 
C407 C414 1.520(10) . ? 
C408 C410 1.59(2) . ? 
C408 C409 1.62(2) . ? 
C48' C40' 1.57(2) . ? 
C48' C49' 1.60(2) . ? 
C411 C413 1.38(3) . ? 
C411 C412 1.47(3) . ? 
C41' C43' 1.43(3) . ? 
C41' C42' 1.48(3) . ? 
C414 C416 1.549(11) . ? 
C414 C415 1.550(11) . ? 
O201 C201 1.281(7) . ? 
O202 C201 1.257(7) . ? 
C201 C202 1.515(8) . ? 
C202 C207 1.403(9) . ? 
C202 C203 1.403(8) . ? 
C203 C204 1.395(9) . ? 
C203 C208 1.521(9) . ? 
C204 C205 1.355(10) . ? 
C205 C206 1.397(10) . ? 
C205 C211 1.551(12) . ? 
C205 C21' 1.60(4) . ? 
C206 C207 1.392(9) . ? 
C207 C214 1.526(9) . ? 
C208 C210 1.519(9) . ? 
C208 C209 1.549(9) . ? 
C211 C213 1.425(13) . ? 
C211 C212 1.52(2) . ? 
C21' C23' 1.43(3) . ? 
C21' C22' 1.50(3) . ? 
C214 C26' 1.43(3) . ? 
C214 C215 1.51(2) . ? 
C214 C216 1.67(2) . ? 
C214 C25' 1.70(3) . ? 
O101 C101 1.263(7) . ? 
O102 C101 1.262(7) . ? 
C101 C102 1.510(8) . ? 
C102 C107 1.387(8) . ? 
C102 C103 1.403(8) . ? 
C103 C104 1.389(9) . ? 
C103 C108 1.533(9) . ? 
C104 C105 1.382(9) . ? 
C105 C106 1.376(9) . ? 
C105 C111 1.515(10) . ? 
C106 C107 1.387(9) . ? 
C107 C14' 1.53(2) . ? 
C107 C114 1.61(2) . ? 
C108 C109 1.49(2) . ? 
C108 C10' 1.54(3) . ? 
C108 C110 1.57(2) . ? 
C108 C09' 1.82(6) . ? 
C111 C13' 1.40(3) . ? 
C111 C112 1.52(2) . ? 
C111 C12' 1.68(3) . ? 
C111 C113 1.72(3) . ? 
C114 C116 1.51(2) . ? 
C114 C115 1.54(2) . ? 
C14' C15' 1.62(2) . ? 
C14' C16' 1.62(2) . ? 
O301 C301 1.266(7) . ? 
O302 C301 1.262(7) . ? 
C301 C302 1.511(9) . ? 
C302 C307 1.397(9) . ? 
C302 C303 1.402(9) . ? 
C303 C304 1.387(9) . ? 
C303 C308 1.527(10) . ? 
C304 C305 1.396(10) . ? 
C305 C306 1.391(11) . ? 
C305 C31' 1.47(2) . ? 
C305 C311 1.62(3) . ? 
C306 C307 1.387(10) . ? 
C307 C314 1.527(10) . ? 
C308 C310 1.29(2) . ? 
C308 C39' 1.40(2) . ? 
C308 C30' 1.63(2) . ? 
C308 C309 1.67(2) . ? 
C311 C312 1.65(2) . ? 
C311 C313 1.67(2) . ? 
C31' C32' 1.57(2) . ? 
C31' C33' 1.60(2) . ? 
C314 C316 1.50(2) . ? 
C314 C35' 1.55(2) . ? 
C314 C315 1.60(2) . ? 
C314 C36' 1.65(3) . ? 
C1S Cl2S 1.679(12) . ? 
C1S Cl1S 1.726(13) . ? 
C2S Cl4S 1.73(3) . ? 
C2S Cl3S 1.95(4) . ? 
 
loop_ 
 _geom_angle_atom_site_label_1 
 _geom_angle_atom_site_label_2 
 _geom_angle_atom_site_label_3 
 _geom_angle 
 _geom_angle_site_symmetry_1 
 _geom_angle_site_symmetry_3 
 _geom_angle_publ_flag 
O202 Cr2 O302 90.8(2) . . ? 
O202 Cr2 O402 174.0(2) . . ? 
O302 Cr2 O402 88.1(2) . . ? 
O202 Cr2 O102 91.8(2) . . ? 
O302 Cr2 O102 173.5(2) . . ? 
O402 Cr2 O102 88.7(2) . . ? 
O202 Cr2 N601 92.3(2) . . ? 
O302 Cr2 N601 95.6(2) . . ? 
O402 Cr2 N601 93.7(2) . . ? 
O102 Cr2 N601 90.2(2) . . ? 
O202 Cr2 Cr1 87.14(11) . . ? 
O302 Cr2 Cr1 87.20(11) . . ? 
O402 Cr2 Cr1 86.88(11) . . ? 
O102 Cr2 Cr1 86.96(11) . . ? 
N601 Cr2 Cr1 177.14(15) . . ? 
O201 Cr1 O401 174.5(2) . . ? 
O201 Cr1 O301 91.5(2) . . ? 
O401 Cr1 O301 87.7(2) . . ? 
O201 Cr1 O101 91.1(2) . . ? 
O401 Cr1 O101 89.3(2) . . ? 
O301 Cr1 O101 173.9(2) . . ? 
O201 Cr1 N501 94.3(2) . . ? 
O401 Cr1 N501 91.2(2) . . ? 
O301 Cr1 N501 89.2(2) . . ? 
O101 Cr1 N501 96.2(2) . . ? 
O201 Cr1 Cr2 87.28(11) . . ? 
O401 Cr1 Cr2 87.25(11) . . ? 
O301 Cr1 Cr2 87.22(11) . . ? 
O101 Cr1 Cr2 87.34(12) . . ? 
N501 Cr1 Cr2 176.1(2) . . ? 
C601 N601 Cr2 167.1(6) . . ? 
N601 C601 C602 178.2(8) . . ? 
C501 N501 Cr1 161.8(6) . . ? 
N501 C501 C502 179.3(9) . . ? 
C401 O401 Cr1 120.7(4) . . ? 
C401 O402 Cr2 119.6(4) . . ? 
O401 C401 O402 122.2(5) . . ? 
O401 C401 C402 118.6(5) . . ? 
O402 C401 C402 119.2(5) . . ? 
C407 C402 C403 120.2(6) . . ? 
C407 C402 C401 118.8(5) . . ? 
C403 C402 C401 120.8(6) . . ? 
C04' C403 C402 118.6(9) . . ? 
C402 C403 C404 119.3(8) . . ? 
C04' C403 C48' 116.2(10) . . ? 
C402 C403 C48' 123.2(7) . . ? 
C402 C403 C408 120.5(11) . . ? 
C404 C403 C408 117.6(12) . . ? 
C405 C404 C403 120.3(13) . . ? 
C406 C405 C404 120.5(13) . . ? 
C406 C405 C411 122.8(16) . . ? 
C404 C405 C411 116.7(15) . . ? 
C405 C406 C407 119.9(12) . . ? 
C403 C04' C05' 121.2(15) . . ? 
C06' C05' C04' 119.6(15) . . ? 
C06' C05' C41' 118.9(16) . . ? 
C04' C05' C41' 121.4(16) . . ? 
C05' C06' C407 120.0(14) . . ? 
C402 C407 C06' 119.2(8) . . ? 
C402 C407 C406 118.9(8) . . ? 
C402 C407 C414 124.5(6) . . ? 
C06' C407 C414 114.4(9) . . ? 
C406 C407 C414 116.3(8) . . ? 
C403 C408 C410 108.9(19) . . ? 
C403 C408 C409 104.7(20) . . ? 
C410 C408 C409 109.0(17) . . ? 
C403 C48' C40' 115.0(11) . . ? 
C403 C48' C49' 110.2(12) . . ? 
C40' C48' C49' 110.0(12) . . ? 
C413 C411 C412 128.5(25) . . ? 
C413 C411 C405 114.5(27) . . ? 
C412 C411 C405 113.8(26) . . ? 
C43' C41' C42' 119.3(20) . . ? 
C43' C41' C05' 115.8(21) . . ? 
C42' C41' C05' 102.8(22) . . ? 
C407 C414 C416 110.2(6) . . ? 
C407 C414 C415 112.4(6) . . ? 
C416 C414 C415 109.8(7) . . ? 
C201 O201 Cr1 118.8(4) . . ? 
C201 O202 Cr2 119.2(4) . . ? 
O202 C201 O201 124.2(5) . . ? 
O202 C201 C202 118.3(5) . . ? 
O201 C201 C202 117.5(5) . . ? 
C207 C202 C203 120.9(5) . . ? 
C207 C202 C201 120.1(5) . . ? 
C203 C202 C201 119.0(5) . . ? 
C204 C203 C202 117.8(6) . . ? 
C204 C203 C208 119.2(6) . . ? 
C202 C203 C208 123.1(5) . . ? 
C205 C204 C203 123.5(6) . . ? 
C204 C205 C206 117.6(6) . . ? 
C204 C205 C211 117.7(7) . . ? 
C206 C205 C211 124.6(8) . . ? 
C204 C205 C21' 139.4(16) . . ? 
C206 C205 C21' 100.2(19) . . ? 
C207 C206 C205 122.5(7) . . ? 
C206 C207 C202 117.8(6) . . ? 
C206 C207 C214 119.9(6) . . ? 
C202 C207 C214 122.4(6) . . ? 
C210 C208 C203 111.5(5) . . ? 
C210 C208 C209 110.4(6) . . ? 
C203 C208 C209 112.3(6) . . ? 
C213 C211 C212 118.5(10) . . ? 
C213 C211 C205 115.1(9) . . ? 
C212 C211 C205 107.9(9) . . ? 
C23' C21' C22' 118.6(28) . . ? 
C23' C21' C205 117.2(27) . . ? 
C22' C21' C205 123.5(28) . . ? 
C26' C214 C207 121.5(20) . . ? 
C215 C214 C207 115.2(8) . . ? 
C215 C214 C216 107.0(10) . . ? 
C207 C214 C216 103.5(11) . . ? 
C26' C214 C25' 113.0(14) . . ? 
C207 C214 C25' 108.0(12) . . ? 
C101 O101 Cr1 119.1(4) . . ? 
C101 O102 Cr2 118.8(4) . . ? 
O102 C101 O101 124.3(5) . . ? 
O102 C101 C102 117.6(5) . . ? 
O101 C101 C102 118.1(5) . . ? 
C107 C102 C103 120.3(6) . . ? 
C107 C102 C101 121.3(5) . . ? 
C103 C102 C101 118.4(5) . . ? 
C104 C103 C102 118.1(6) . . ? 
C104 C103 C108 120.2(5) . . ? 
C102 C103 C108 121.8(5) . . ? 
C105 C104 C103 122.9(6) . . ? 
C106 C105 C104 117.1(6) . . ? 
C106 C105 C111 120.5(6) . . ? 
C104 C105 C111 122.4(6) . . ? 
C105 C106 C107 122.8(6) . . ? 
C106 C107 C102 118.7(6) . . ? 
C106 C107 C14' 116.6(8) . . ? 
C102 C107 C14' 124.0(8) . . ? 
C106 C107 C114 125.6(8) . . ? 
C102 C107 C114 115.0(8) . . ? 
C109 C108 C103 113.2(10) . . ? 
C103 C108 C10' 112.3(12) . . ? 
C109 C108 C110 116.6(15) . . ? 
C103 C108 C110 109.9(8) . . ? 
C103 C108 C09' 103.3(18) . . ? 
C10' C108 C09' 96.8(28) . . ? 
C13' C111 C105 115.8(13) . . ? 
C112 C111 C105 113.9(9) . . ? 
C13' C111 C12' 117.7(14) . . ? 
C105 C111 C12' 103.1(12) . . ? 
C112 C111 C113 109.9(11) . . ? 
C105 C111 C113 104.8(10) . . ? 
C116 C114 C115 109.0(14) . . ? 
C116 C114 C107 113.6(15) . . ? 
C115 C114 C107 100.6(13) . . ? 
C107 C14' C15' 112.6(13) . . ? 
C107 C14' C16' 108.6(13) . . ? 
C15' C14' C16' 95.4(13) . . ? 
C301 O301 Cr1 118.5(4) . . ? 
C301 O302 Cr2 119.4(4) . . ? 
O302 C301 O301 124.5(5) . . ? 
O302 C301 C302 117.0(5) . . ? 
O301 C301 C302 118.4(5) . . ? 
C307 C302 C303 121.4(6) . . ? 
C307 C302 C301 119.2(6) . . ? 
C303 C302 C301 119.4(5) . . ? 
C304 C303 C302 118.0(6) . . ? 
C304 C303 C308 121.5(6) . . ? 
C302 C303 C308 120.6(6) . . ? 
C303 C304 C305 122.5(7) . . ? 
C306 C305 C304 117.5(6) . . ? 
C306 C305 C31' 116.3(11) . . ? 
C304 C305 C31' 126.2(11) . . ? 
C306 C305 C311 132.5(11) . . ? 
C304 C305 C311 109.7(12) . . ? 
C307 C306 C305 122.5(7) . . ? 
C306 C307 C302 118.2(6) . . ? 
C306 C307 C314 120.6(6) . . ? 
C302 C307 C314 121.2(6) . . ? 
C310 C308 C303 114.0(12) . . ? 
C39' C308 C303 120.9(10) . . ? 
C39' C308 C30' 112.3(11) . . ? 
C303 C308 C30' 111.0(7) . . ? 
C310 C308 C309 117.0(14) . . ? 
C303 C308 C309 106.9(8) . . ? 
C305 C311 C312 101.1(17) . . ? 
C305 C311 C313 103.1(17) . . ? 
C312 C311 C313 98.4(15) . . ? 
C305 C31' C32' 117.9(15) . . ? 
C305 C31' C33' 109.9(13) . . ? 
C32' C31' C33' 111.7(16) . . ? 
C316 C314 C307 116.3(10) . . ? 
C307 C314 C35' 108.5(10) . . ? 
C316 C314 C315 110.8(11) . . ? 
C307 C314 C315 110.3(7) . . ? 
C307 C314 C36' 105.0(13) . . ? 
C35' C314 C36' 107.9(14) . . ? 
Cl2S C1S Cl1S 112.9(6) . . ? 
Cl4S C2S Cl3S 101.7(19) . . ? 
 
_refine_diff_density_max    0.614 
_refine_diff_density_min   -0.803 
_refine_diff_density_rms    0.104 

#===END
 
data_xl_compound_3 

_audit_creation_method            SHELXL
_chemical_name_systematic
;
 Tetrakisacetatodiacetonitriledichromium(II)
;
_chemical_name_common             ?
_chemical_formula_moiety          'Cr2 (C2 H3 O2)4 (C2 H3 N)2,2(C2 H3 N)'
_chemical_formula_structural      'Cr2 (O2CCH3)4 (CH3CN)2,2(CH3CN)'
_chemical_formula_analytical      'not measured'
_chemical_formula_sum             'C16 H24 Cr2 N4 O8'
_chemical_formula_weight          504.39
_chemical_melting_point           'not measured'
_chemical_compound_source         synthesized 
 
loop_ 
 _atom_type_symbol 
 _atom_type_description 
 _atom_type_scat_dispersion_real 
 _atom_type_scat_dispersion_imag 
 _atom_type_scat_source 
 'C'  'C'   0.0033   0.0016 
 'International Tables Vol C Tables 4.2.6.8 and 6.1.1.4' 
 'H'  'H'   0.0000   0.0000 
 'International Tables Vol C Tables 4.2.6.8 and 6.1.1.4' 
 'N'  'N'   0.0061   0.0033 
 'International Tables Vol C Tables 4.2.6.8 and 6.1.1.4' 
 'O'  'O'   0.0106   0.0060 
 'International Tables Vol C Tables 4.2.6.8 and 6.1.1.4' 
 'Cr'  'Cr'   0.3209   0.6236 
 'International Tables Vol C Tables 4.2.6.8 and 6.1.1.4' 
 
_symmetry_cell_setting            monoclinic 
_symmetry_space_group_name_H-M    'P 1 21/n 1'
 
loop_ 
 _symmetry_equiv_pos_as_xyz 
 'x, y, z' 
 '-x+1/2, y+1/2, -z+1/2' 
 '-x, -y, -z' 
 'x-1/2, -y-1/2, z-1/2' 
 
_cell_length_a                    10.701(2) 
_cell_length_b                    10.206(2) 
_cell_length_c                    10.912(2) 
_cell_angle_alpha                 90.00 
_cell_angle_beta                  101.978(4) 
_cell_angle_gamma                 90.00 
_cell_volume                      1165.8(4) 
_cell_formula_units_Z             2 
_cell_measurement_temperature     213(2) 
_cell_measurement_reflns_used     4632 
_cell_measurement_theta_min       2.43 
_cell_measurement_theta_max       28.32 
 
_exptl_crystal_description        prism 
_exptl_crystal_colour             red 
_exptl_crystal_size_max           0.36 
_exptl_crystal_size_mid           0.28 
_exptl_crystal_size_min           0.26 
_exptl_crystal_density_meas       none 
_exptl_crystal_density_diffrn     1.437 
_exptl_crystal_density_method     none 
_exptl_crystal_F_000              520 
_exptl_absorpt_coefficient_mu     0.977 
_exptl_absorpt_correction_type    muti-scan 
_exptl_absorpt_correction_T_min   0.43 
_exptl_absorpt_correction_T_max   0.69 
 
_exptl_special_details 
; 
 ? 
; 
 
_diffrn_ambient_temperature       213(2) 
_diffrn_radiation_wavelength      0.71073 
_diffrn_radiation_type            MoK\a 
_diffrn_radiation_source          'fine-focus sealed tube' 
_diffrn_radiation_monochromator   graphite 
_diffrn_measurement_device        'Bruker SMART area detector'
_diffrn_measurement_method        'Ellipsoid-mask fitting'
_diffrn_standards_number          'none (area detector data)'
_diffrn_standards_interval_count  none
_diffrn_standards_interval_time   none
_diffrn_standards_decay_%         none
_diffrn_reflns_number             7053 
_diffrn_reflns_av_R_equivalents   0.0464 
_diffrn_reflns_av_sigmaI/netI     0.0387 
_diffrn_reflns_limit_h_min        -10 
_diffrn_reflns_limit_h_max        14 
_diffrn_reflns_limit_k_min        -13 
_diffrn_reflns_limit_k_max        13 
_diffrn_reflns_limit_l_min        -14 
_diffrn_reflns_limit_l_max        14 
_diffrn_reflns_theta_min          2.43 
_diffrn_reflns_theta_max          28.47 
_reflns_number_total              2710 
_reflns_number_observed           2123 
_reflns_observed_criterion        >2sigma(I) 
 
_computing_data_collection        SMART
_computing_cell_refinement        Saint
_computing_data_reduction         Saint
_computing_structure_solution     'SHELXTL V.5 (Siemens, 1994)'
_computing_structure_refinement   'SHELXL-93 (Sheldrick, 1993)'
_computing_molecular_graphics     'SHELXTL V.5 (Siemens, 1994)'
_computing_publication_material   CIFTAB
 
_refine_special_details 
; 
 Refinement on F^2^ for ALL reflections except for 2 with very negative F^2^ 
 or flagged by the user for potential systematic errors.  Weighted R-factors 
 wR and all goodnesses of fit S are based on F^2^, conventional R-factors R 
 are based on F, with F set to zero for negative F^2^. The observed criterion 
 of F^2^ > 2sigma(F^2^) is used only for calculating _R_factor_obs etc. and is 
 not relevant to the choice of reflections for refinement.  R-factors based 
 on F^2^ are statistically about twice as large as those based on F, and R- 
 factors based on ALL data will be even larger. 
; 
 
_refine_ls_structure_factor_coef  Fsqd  
_refine_ls_matrix_type            full 
_refine_ls_weighting_scheme 
 'calc w=1/[\s^2^(Fo^2^)+(0.0759P)^2^+1.5885P] where P=(Fo^2^+2Fc^2^)/3' 
_atom_sites_solution_primary      direct 
_atom_sites_solution_secondary    difmap 
_atom_sites_solution_hydrogens    geom 
_refine_ls_hydrogen_treatment     ref 
_refine_ls_extinction_method      none 
_refine_ls_extinction_coef        ? 
_refine_ls_number_reflns          2708 
_refine_ls_number_parameters      143 
_refine_ls_number_restraints      0 
_refine_ls_R_factor_all           0.0695 
_refine_ls_R_factor_obs           0.0527 
_refine_ls_wR_factor_all          0.1688 
_refine_ls_wR_factor_obs          0.1458 
_refine_ls_goodness_of_fit_all    1.096 
_refine_ls_goodness_of_fit_obs    1.117 
_refine_ls_restrained_S_all       1.140 
_refine_ls_restrained_S_obs       1.117 
_refine_ls_shift/esd_max          0.008 
_refine_ls_shift/esd_mean         0.000 
 
loop_ 
 _atom_site_label 
 _atom_site_type_symbol 
 _atom_site_fract_x 
 _atom_site_fract_y 
 _atom_site_fract_z 
 _atom_site_U_iso_or_equiv 
 _atom_site_thermal_displace_type 
 _atom_site_occupancy 
 _atom_site_calc_flag 
 _atom_site_refinement_flags 
 _atom_site_disorder_group 
Cr1 Cr 0.03628(5) 0.10625(5) 0.03832(5) 0.0304(2) Uani 1 d . . 
O11 O -0.0425(2) -0.0393(2) -0.2132(2) 0.0378(6) Uani 1 d . . 
O12 O 0.0252(2) 0.1579(2) -0.1413(2) 0.0380(6) Uani 1 d . . 
O21 O 0.1488(2) -0.1555(2) -0.0206(2) 0.0385(6) Uani 1 d . . 
O22 O 0.2166(2) 0.0419(2) 0.0512(3) 0.0393(6) Uani 1 d . . 
N1S N 0.1755(7) 0.4776(7) -0.1911(7) 0.116(2) Uani 1 d . . 
N31 N 0.1067(3) 0.3141(3) 0.1084(3) 0.0465(8) Uani 1 d . . 
C1S C 0.2365(6) 0.3821(6) -0.1873(6) 0.0697(14) Uani 1 d . . 
C2S C 0.3143(5) 0.2617(5) -0.1817(5) 0.0615(12) Uani 1 d . . 
H2SC H 0.3023(39) 0.2084(25) -0.1114(30) 0.130(28) Uiso 1 calc R . 
H2SB H 0.4037(7) 0.2851(6) -0.1711(49) 0.140(30) Uiso 1 calc R . 
H2SA H 0.2878(34) 0.2126(26) -0.2588(21) 0.146(33) Uiso 1 calc R . 
C11 C -0.0143(3) 0.0785(4) -0.2290(3) 0.0376(8) Uani 1 d . . 
C12 C -0.0277(5) 0.1268(5) -0.3610(4) 0.0575(11) Uani 1 d . . 
H12A H -0.0539(34) 0.2180(11) -0.3656(8) 0.086 Uiso 1 calc R . 
H12B H -0.0915(25) 0.0749(23) -0.4164(6) 0.086 Uiso 1 calc R . 
H12C H 0.0537(10) 0.1187(34) -0.3864(13) 0.086 Uiso 1 calc R . 
C21 C 0.2366(3) -0.0753(4) 0.0231(3) 0.0360(7) Uani 1 d . . 
C22 C 0.3718(4) -0.1222(5) 0.0430(5) 0.0554(11) Uani 1 d . . 
H22A H 0.4261(6) -0.0659(21) 0.1032(25) 0.083 Uiso 1 calc R . 
H22B H 0.4000(12) -0.1199(33) -0.0359(8) 0.083 Uiso 1 calc R . 
H22C H 0.3769(7) -0.2114(13) 0.0745(31) 0.083 Uiso 1 calc R . 
C31 C 0.1222(4) 0.4233(4) 0.1215(4) 0.0404(8) Uani 1 d . . 
C32 C 0.1441(4) 0.5631(4) 0.1370(4) 0.0516(10) Uani 1 d . . 
H32A H 0.1656(32) 0.5990(7) 0.0617(13) 0.077 Uiso 1 calc R . 
H32B H 0.2141(21) 0.5787(4) 0.2077(20) 0.077 Uiso 1 calc R . 
H32C H 0.0674(11) 0.6052(6) 0.1520(32) 0.077 Uiso 1 calc R . 
 
loop_ 
 _atom_site_aniso_label 
 _atom_site_aniso_U_11 
 _atom_site_aniso_U_22 
 _atom_site_aniso_U_33 
 _atom_site_aniso_U_23 
 _atom_site_aniso_U_13 
 _atom_site_aniso_U_12 
Cr1 0.0333(3) 0.0214(3) 0.0373(3) 0.0001(2) 0.0095(2) -0.0001(2) 
O11 0.0468(14) 0.0303(12) 0.0373(13) -0.0004(10) 0.0108(11) -0.0008(10) 
O12 0.0474(14) 0.0273(12) 0.0406(13) 0.0045(10) 0.0122(11) -0.0014(10) 
O21 0.0389(13) 0.0290(12) 0.0484(14) -0.0024(10) 0.0107(11) 0.0043(10) 
O22 0.0352(12) 0.0306(13) 0.0525(15) -0.0003(11) 0.0099(11) -0.0021(10) 
N1S 0.125(5) 0.087(4) 0.157(6) 0.040(4) 0.076(5) 0.037(4) 
N31 0.054(2) 0.032(2) 0.052(2) -0.0010(15) 0.0057(15) -0.0026(15) 
C1S 0.074(3) 0.064(3) 0.074(3) 0.010(3) 0.021(3) -0.007(3) 
C2S 0.054(3) 0.064(3) 0.068(3) 0.004(2) 0.017(2) -0.003(2) 
C11 0.038(2) 0.037(2) 0.041(2) 0.0068(15) 0.0135(15) -0.0001(14) 
C12 0.072(3) 0.058(3) 0.043(2) 0.012(2) 0.014(2) -0.005(2) 
C21 0.035(2) 0.035(2) 0.041(2) 0.0017(14) 0.0142(14) 0.0038(14) 
C22 0.038(2) 0.058(3) 0.073(3) -0.003(2) 0.016(2) 0.010(2) 
C31 0.043(2) 0.031(2) 0.044(2) -0.0013(15) 0.002(2) 0.0001(15) 
C32 0.055(2) 0.027(2) 0.065(3) 0.001(2) -0.005(2) 0.002(2) 
 
_geom_special_details 
; 
 All esds (except the esd in the dihedral angle between two l.s. planes) 
 are estimated using the full covariance matrix.  The cell esds are taken 
 into account individually in the estimation of esds in distances, angles 
 and torsion angles; correlations between esds in cell parameters are only 
 used when they are defined by crystal symmetry.  An approximate (isotropic) 
 treatment of cell esds is used for estimating esds involving l.s. planes. 
; 
 
loop_ 
 _geom_bond_atom_site_label_1 
 _geom_bond_atom_site_label_2 
 _geom_bond_distance 
 _geom_bond_site_symmetry_2 
 _geom_bond_publ_flag 
Cr1 O12 2.010(3) . ? 
Cr1 O21 2.013(3) 3 ? 
Cr1 O11 2.015(2) 3 ? 
Cr1 O22 2.015(3) . ? 
Cr1 N31 2.326(3) . ? 
Cr1 Cr1 2.3950(11) 3 ? 
O11 C11 1.260(4) . ? 
O11 Cr1 2.015(2) 3 ? 
O12 C11 1.258(5) . ? 
O21 C21 1.263(5) . ? 
O21 Cr1 2.013(3) 3 ? 
O22 C21 1.264(4) . ? 
N1S C1S 1.168(8) . ? 
N31 C31 1.132(5) . ? 
C1S C2S 1.478(8) . ? 
C2S H2SC 0.97 . ? 
C2S H2SB 0.97 . ? 
C2S H2SA 0.97 . ? 
C11 C12 1.501(5) . ? 
C12 H12A 0.97 . ? 
C12 H12B 0.97 . ? 
C12 H12C 0.97 . ? 
C21 C22 1.496(5) . ? 
C22 H22A 0.97 . ? 
C22 H22B 0.97 . ? 
C22 H22C 0.97 . ? 
C31 C32 1.450(5) . ? 
C32 H32A 0.97 . ? 
C32 H32B 0.97 . ? 
C32 H32C 0.97 . ? 
 
loop_ 
 _geom_angle_atom_site_label_1 
 _geom_angle_atom_site_label_2 
 _geom_angle_atom_site_label_3 
 _geom_angle 
 _geom_angle_site_symmetry_1 
 _geom_angle_site_symmetry_3 
 _geom_angle_publ_flag 
O12 Cr1 O21 89.01(11) . 3 ? 
O12 Cr1 O11 175.17(10) . 3 ? 
O21 Cr1 O11 90.81(11) 3 3 ? 
O12 Cr1 O22 90.88(11) . . ? 
O21 Cr1 O22 175.26(10) 3 . ? 
O11 Cr1 O22 88.90(11) 3 . ? 
O12 Cr1 N31 91.78(11) . . ? 
O21 Cr1 N31 92.79(11) 3 . ? 
O11 Cr1 N31 93.05(11) 3 . ? 
O22 Cr1 N31 91.96(11) . . ? 
O12 Cr1 Cr1 87.00(8) . 3 ? 
O21 Cr1 Cr1 87.22(8) 3 3 ? 
O11 Cr1 Cr1 88.17(8) 3 3 ? 
O22 Cr1 Cr1 88.04(8) . 3 ? 
N31 Cr1 Cr1 178.78(9) . 3 ? 
C11 O11 Cr1 119.5(2) . 3 ? 
C11 O12 Cr1 121.0(2) . . ? 
C21 O21 Cr1 121.0(2) . 3 ? 
C21 O22 Cr1 119.9(2) . . ? 
C31 N31 Cr1 165.6(3) . . ? 
N1S C1S C2S 179.6(6) . . ? 
C1S C2S H2SC 109.5(3) . . ? 
C1S C2S H2SB 109.5(3) . . ? 
H2SC C2S H2SB 109.5 . . ? 
C1S C2S H2SA 109.5(3) . . ? 
H2SC C2S H2SA 109.5 . . ? 
H2SB C2S H2SA 109.5 . . ? 
O12 C11 O11 124.2(3) . . ? 
O12 C11 C12 118.0(3) . . ? 
O11 C11 C12 117.8(4) . . ? 
C11 C12 H12A 109.5(2) . . ? 
C11 C12 H12B 109.5(2) . . ? 
H12A C12 H12B 109.5 . . ? 
C11 C12 H12C 109.5(2) . . ? 
H12A C12 H12C 109.5 . . ? 
H12B C12 H12C 109.5 . . ? 
O21 C21 O22 123.7(3) . . ? 
O21 C21 C22 117.9(3) . . ? 
O22 C21 C22 118.4(4) . . ? 
C21 C22 H22A 109.5(2) . . ? 
C21 C22 H22B 109.5(2) . . ? 
H22A C22 H22B 109.5 . . ? 
C21 C22 H22C 109.5(2) . . ? 
H22A C22 H22C 109.5 . . ? 
H22B C22 H22C 109.5 . . ? 
N31 C31 C32 178.9(5) . . ? 
C31 C32 H32A 109.5(3) . . ? 
C31 C32 H32B 109.5(2) . . ? 
H32A C32 H32B 109.5 . . ? 
C31 C32 H32C 109.5(2) . . ? 
H32A C32 H32C 109.5 . . ? 
H32B C32 H32C 109.5 . . ? 
 
_refine_diff_density_max    1.071 
_refine_diff_density_min   -0.545 
_refine_diff_density_rms    0.091 

#===END
